# Supplementary material for: Diagnosis and Treatment of Deep Vein Thrombosis in the Emergency Department: Results of an Italian Nominal Group Technique Study
Source: PubMed Central journal article supplement — Clin Appl Thromb Hemost. 2020 Oct 28;26:1076029620959720. doi: 10.1177/1076029620959720 (PMC7791439; doi:10.1177/1076029620959720), 2020-10-28

**Online-only supplementary materials**

Figure S1 – DVT statements with percentages of agreement

*(% of experts who assigned a score of 4 or 5)*

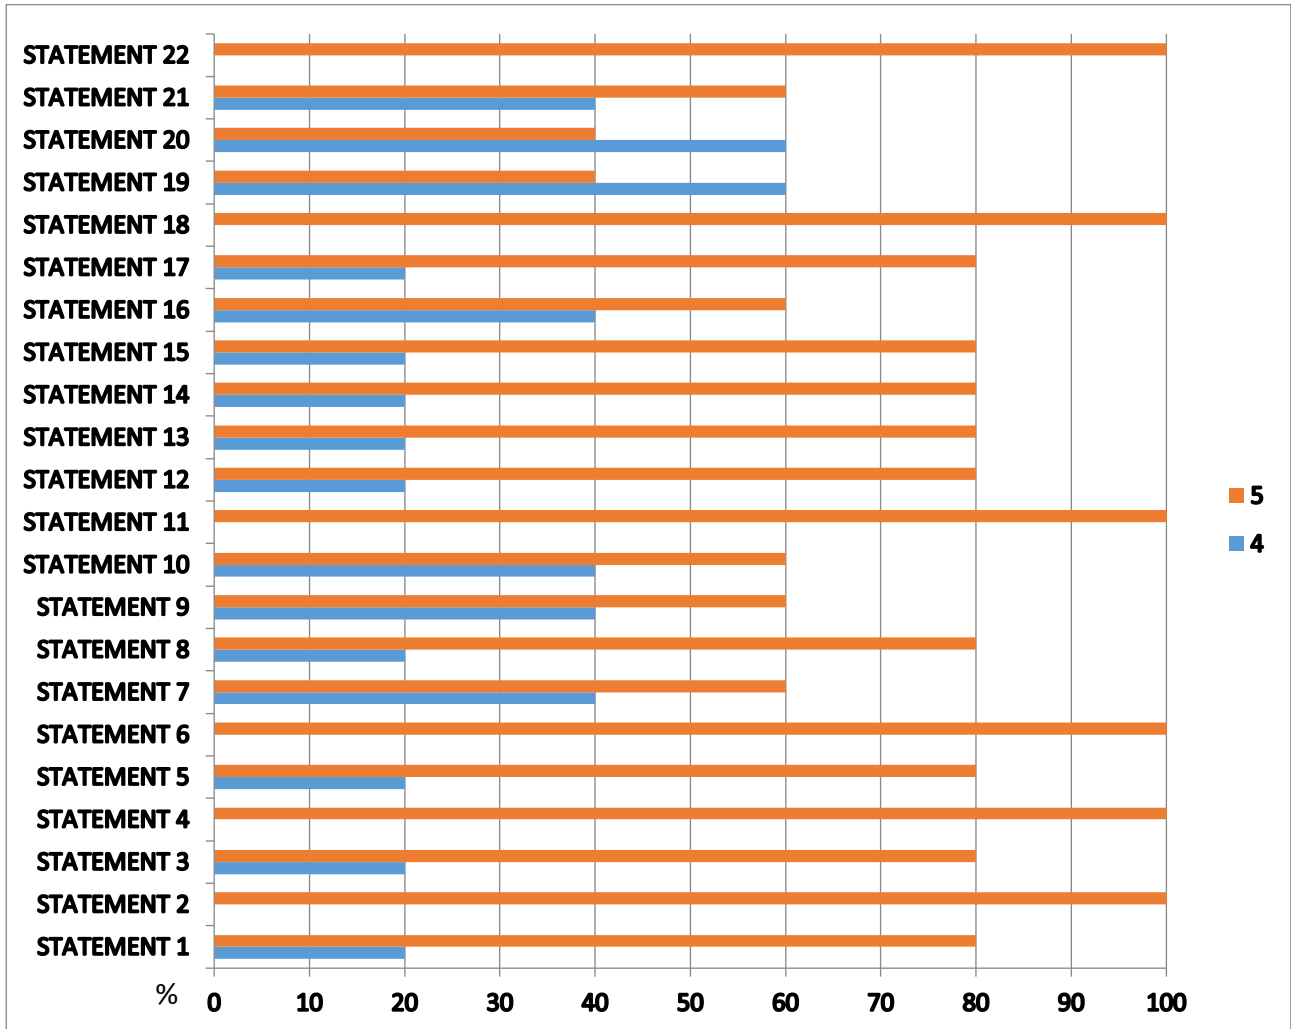

Supplement: supplementary_material.pdf [file supplementary_material.pdf]
